# Supplementary material for: Encapsulating bacteria in alginate-based electrospun nanofibers
Source: Royal Society of Chemistry journal article supplement (doi:10.1039/d0bm02205e), 2021-01-01
Supplement: d0bm02205e1.pdf [file d0bm02205e1.pdf]

# Supplementary Information

## Encapsulating bacteria in alginate-based electrospun nanofibers

Emily Diep and Jessica D. Schiffman\*

Department of Chemical Engineering, University of Massachusetts  
Amherst, Amherst, MA 01003, United States

\*Corresponding authors: [schiffman@ecs.umass.edu](mailto:schiffman@ecs.umass.edu)

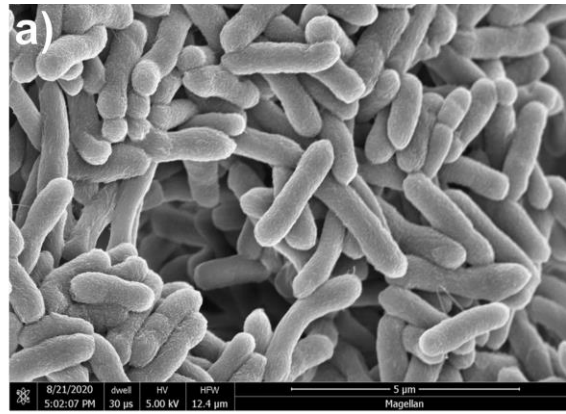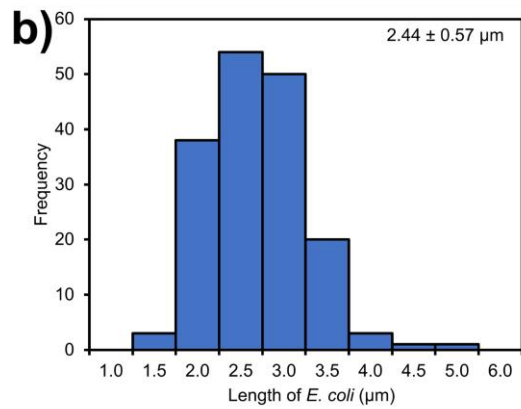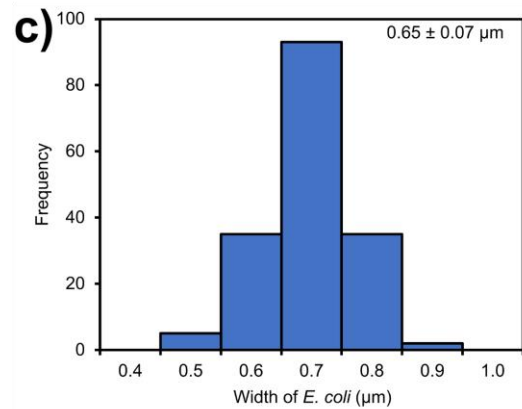

**Figure S1:** (a) SEM micrograph of *E. coli* cells. (b) Length and (c) width distributions of *E. coli* cells are reported as average  $\pm$  standard deviation.

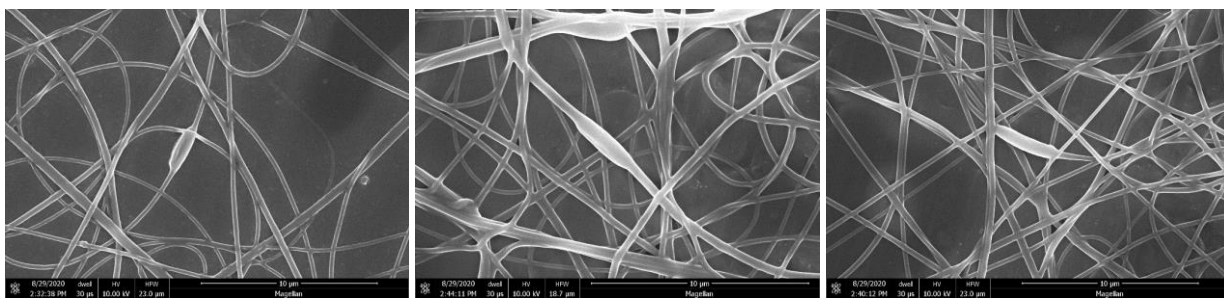

**Figure S2:** SEM micrographs of *E. coli* encapsulated in 2.5/1.5/3 wt% SA/PEO/PS80 electrospun nanofibers.
